# Supplementary material
Source: Springer Nature journal article supplement (https://www.springermedizin.de/resource/supplementary/12891_2010_972_MOESM3_ESM.pdf/9506826)

□ Hip fractures one year    ◻ Controls one year    ▨ Hip fractures two years    ■ Controls two years

**HRQOL**

**GQOL**

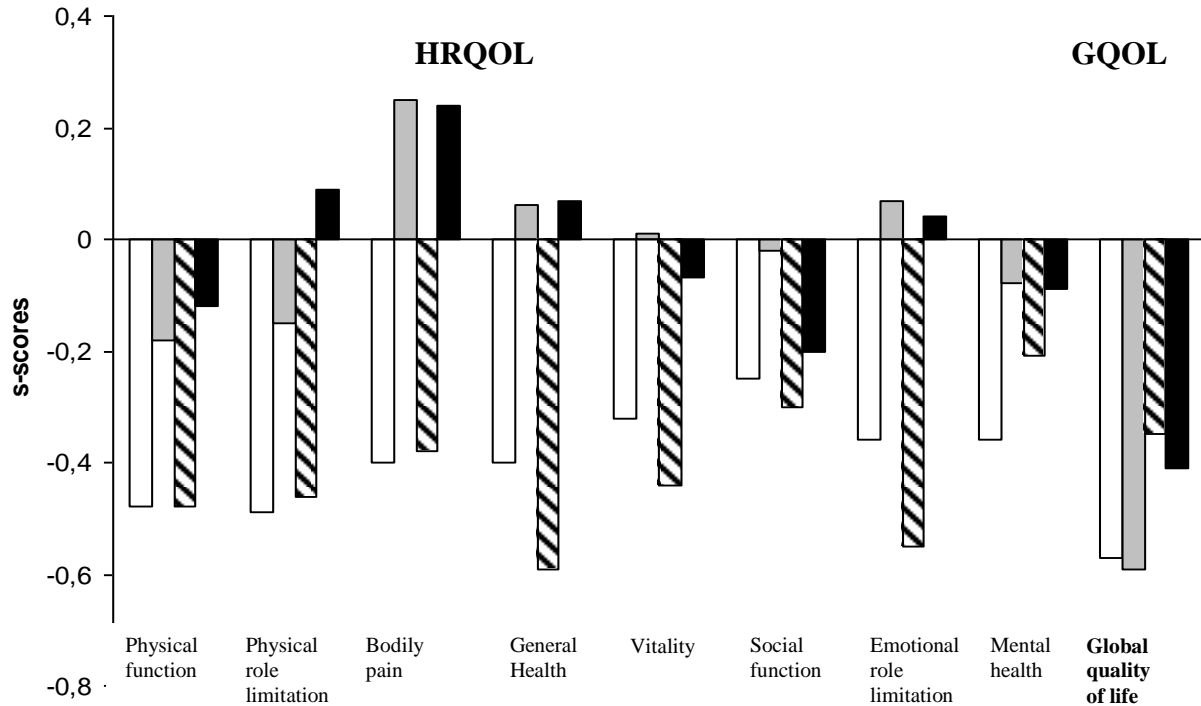

Supplement: MOESM3 [file 9506826]
